# Supplementary material
Source: HighWire-hosted journal article supplement (https://bmjopen.bmj.com/content/8/3/e019983)
Supplement: inline-supplementary-material-1 [file inline-supplementary-material-1.pdf]

## **Appendix 1. ANZCTR retrospective registration survey**

### **1. Full name (please leave blank if you prefer to remain anonymous)**

\_\_\_\_\_

### **2. Registration ID (ACTRN) included in email invitation (please leave blank if you prefer to remain anonymous)**

\_\_\_\_\_

### **3. When you registered this study, what was your role? (tick all that apply)**

- ☐ Trial coordinator/research staff
- ☐ Principal investigator/chief investigator
- ☐ Administrative assistant
- ☐ Contract research organisation (CRO) staff
- ☐ Other (please specify) \_\_\_\_\_

### **4. Why was your study not registered on ANZCTR prior to enrolment of the first participant (i.e. prospectively)? (tick all that apply)**

- ☐ I was not aware of the prospective registration requirement.
- ☐ I did not think prospective registration was important.
- ☐ I did not have enough time.
- ☐ I knew it was a requirement but forgot to do it.
- ☐ I already registered prospectively elsewhere.
- ☐ I thought somebody else had registered the study already.
- ☐ I did not think I was responsible for registration of this study.
- ☐ I thought the prospective registration requirement only applied to industry funded trials.
- ☐ I did not realize that my study meets the definition of a clinical trial.
- ☐ My local registry does not accept retrospective registration so I used ANZCTR instead.
- ☐ I thought my submitted study had been registered already – I did not realise that final approval was pending.
- ☐ I thought it was sufficient to submit the form before commencing enrolment - I did not realise that full approval was required.
- ☐ Other (please specify) \_\_\_\_\_

### **5. Please tick any factors that would have helped you to register your study on ANZCTR before the first participant was enrolled.**

- ☐ Registration ID required on ethics form
- ☐ Having ethics submission automatically uploaded to ANZCTR.
- ☐ Having prospective registration on a checklist provided by ethics committee or another regulatory body.
- ☐ Software prompts from a regulatory body/other.
- ☐ Having it included in my organisation's procedures manual.
- ☐ Other (please specify) \_\_\_\_\_
