# Supplementary material
Source: HighWire-hosted journal article supplement (https://bmjopen.bmj.com/content/8/3/e019983)
Supplement: inline-supplementary-material-2 [file inline-supplementary-material-2.pdf]

## Appendix 2. Intervention type of trials included in part 1 descriptive analysis

| Intervention code                                        | No. of trials |
|----------------------------------------------------------|---------------|
| Behaviour                                                | 1243          |
| Diagnosis / Prognosis                                    | 282           |
| Early detection / Screening                              | 311           |
| Lifestyle                                                | 952           |
| Not applicable                                           | 15            |
| Other interventions                                      | 585           |
| Prevention                                               | 1579          |
| Rehabilitation                                           | 863           |
| Treatment: devices                                       | 1158          |
| Treatment: drugs                                         | 2803          |
| Treatment: other                                         | 2477          |
| Treatment: surgery                                       | 437           |
| Missing                                                  | 55            |
| <b>Total no. of intervention codes across all trials</b> | <b>12760</b>  |
| <b>Total no. of trials</b>                               | <b>9450</b>   |

Note: Up to three different intervention codes can be selected per trial. Therefore, the total number of trials with an intervention code listed is different to the total number of trials.

Full definitions for each of these intervention codes are available at [www.anzctr.org.au/docs/ANZCTR Data field explanation.pdf](http://www.anzctr.org.au/docs/ANZCTR_Data_field_explanation.pdf)
