# Supplementary material
Source: HighWire-hosted journal article supplement (https://bmjopen.bmj.com/content/8/3/e019983)
Supplement: inline-supplementary-material-3 [file inline-supplementary-material-3.pdf]

### Appendix 3. Registrant country of trials included in part 1 descriptive analysis

| REGISTRANT COUNTRY                           | n     | %     |
|----------------------------------------------|-------|-------|
| <b>Australia/New Zealand</b>                 |       |       |
| Australia                                    | 6,708 | 70.98 |
| New Zealand                                  | 1,127 | 11.93 |
| Subtotal                                     | 7,835 | 82.91 |
| <b>Countries with a WHO Network Registry</b> |       |       |
| Brazil                                       | 208   | 2.2   |
| China                                        | 83    | 0.88  |
| Egypt                                        | 142   | 1.50  |
| Ethiopia                                     | 1     | 0.01  |
| Gambia                                       | 1     | 0.01  |
| Germany                                      | 15    | 0.16  |
| Ghana                                        | 1     | 0.01  |
| India                                        | 12    | 0.13  |
| Iran, Islamic Republic Of                    | 93    | 0.98  |
| Japan                                        | 6     | 0.06  |
| Kenya                                        | 1     | 0.01  |
| Korea, Republic Of                           | 30    | 0.32  |
| Netherlands                                  | 3     | 0.03  |
| Nigeria                                      | 2     | 0.02  |
| South Africa                                 | 1     | 0.01  |
| Sri Lanka                                    | 1     | 0.01  |
| Tanzania, United Republic Of                 | 2     | 0.02  |
| Thailand                                     | 25    | 0.26  |
| Tunisia                                      | 11    | 0.12  |
| United Kingdom                               | 36    | 0.38  |
| United States of America                     | 166   | 1.76  |
| Subtotal                                     | 840   | 8.88  |
| <b>Other</b>                                 |       |       |
| Azerbaijan                                   | 1     | 0.01  |
| Bahrain                                      | 2     | 0.02  |
| Bangladesh                                   | 1     | 0.01  |
| Belgium                                      | 2     | 0.02  |
| Bosnia and Herzegovina                       | 1     | 0.01  |
| Brunei Darussalam                            | 1     | 0.01  |
| Cambodia                                     | 8     | 0.08  |
| Canada                                       | 28    | 0.30  |
| Chile                                        | 1     | 0.01  |
| Colombia                                     | 4     | 0.04  |
| Costa Rica                                   | 1     | 0.01  |
| Croatia                                      | 6     | 0.06  |
| Czech Republic                               | 12    | 0.13  |

|                           |              |            |
|---------------------------|--------------|------------|
| Denmark                   | 2            | 0.02       |
| El Salvador               | 2            | 0.02       |
| Estonia                   | 1            | 0.01       |
| Fiji                      | 3            | 0.03       |
| Finland                   | 17           | 0.18       |
| France                    | 11           | 0.12       |
| Greece                    | 40           | 0.42       |
| Hong Kong                 | 36           | 0.38       |
| Iceland                   | 1            | 0.01       |
| Indonesia                 | 8            | 0.08       |
| Iraq                      | 3            | 0.03       |
| Ireland                   | 2            | 0.02       |
| Israel                    | 7            | 0.07       |
| Italy                     | 79           | 0.84       |
| Jamaica                   | 1            | 0.01       |
| Jordan                    | 1            | 0.01       |
| Lebanon                   | 5            | 0.05       |
| Lithuania                 | 2            | 0.02       |
| Malaysia                  | 42           | 0.44       |
| Mexico                    | 10           | 0.11       |
| Myanmar                   | 3            | 0.03       |
| Norway                    | 11           | 0.12       |
| Pakistan                  | 18           | 0.19       |
| Papua New Guinea          | 2            | 0.02       |
| Philippines               | 3            | 0.03       |
| Poland                    | 32           | 0.34       |
| Portugal                  | 3            | 0.03       |
| Romania                   | 6            | 0.06       |
| Saudi Arabia              | 19           | 0.2        |
| Serbia and Montenegro     | 5            | 0.05       |
| Singapore                 | 32           | 0.34       |
| Slovenia                  | 3            | 0.03       |
| Spain                     | 56           | 0.59       |
| Sweden                    | 14           | 0.15       |
| Switzerland               | 75           | 0.79       |
| Taiwan, Province Of China | 35           | 0.37       |
| Turkey                    | 94           | 0.99       |
| United Arab Emirates      | 3            | 0.03       |
| Uruguay                   | 2            | 0.02       |
| Venezuela                 | 1            | 0.01       |
| Vietnam                   | 6            | 0.06       |
| Missing                   | 11           | 0.12       |
| Subtotal                  | 775          | 8.15       |
| <b>Total</b>              | <b>9,450</b> | <b>100</b> |
