# Supplementary material
Source: HighWire-hosted journal article supplement (https://bmjopen.bmj.com/content/8/3/e019983)
Supplement: inline-supplementary-material-4 [file inline-supplementary-material-4.pdf]

**Appendix 4. Post-hoc analysis: Proportion of prospectively registered trials per country when prospective registration defined as submission (not acceptance) of registration entry**

| <b>Year</b>  | <b>ANZ</b> | <b>WHO</b> | <b>Other</b> | <b>TOTAL</b> |
|--------------|------------|------------|--------------|--------------|
| <b>2006</b>  | 62%        | 61%        | 22%          | 61%          |
| <b>2007</b>  | 66%        | 45%        | 15%          | 61%          |
| <b>2008</b>  | 67%        | 41%        | 32%          | 61%          |
| <b>2009</b>  | 69%        | 35%        | 24%          | 62%          |
| <b>2010</b>  | 67%        | 34%        | 32%          | 57%          |
| <b>2011</b>  | 66%        | 42%        | 31%          | 59%          |
| <b>2012</b>  | 74%        | 46%        | 41%          | 67%          |
| <b>2013</b>  | 75%        | 46%        | 35%          | 69%          |
| <b>2014</b>  | 79%        | 54%        | 43%          | 73%          |
| <b>2015</b>  | 77%        | 57%        | 45%          | 73%          |
| <b>TOTAL</b> | <b>72%</b> | <b>44%</b> | <b>36%</b>   | <b>65%</b>   |

ANZ= Australia/New Zealand; WHO = other countries with a WHO Network Registry; Other = all other countries
