# Supplementary material
Source: HighWire-hosted journal article supplement (https://bmjopen.bmj.com/content/8/3/e019983)
Supplement: inline-supplementary-material-5 [file inline-supplementary-material-5.pdf]

## Appendix 6. Baseline characteristics of survey respondents compared to entire sample and dataset

|                                                                               |                                 | Dataset from which<br>sample was drawn <sup>#</sup> | Entire sample,<br>including non-<br>respondents | All respondents,<br>including anonymous | Respondents,<br>excluding anonymous |
|-------------------------------------------------------------------------------|---------------------------------|-----------------------------------------------------|-------------------------------------------------|-----------------------------------------|-------------------------------------|
|                                                                               |                                 | (N=2755)<br>n (%)                                   | (N=404)<br>n (%)                                | (N=149)<br>n (%)                        | (N=73)<br>n (%)                     |
| Registrant<br>country                                                         | Australia                       | 1649 (59.9)                                         | 264 (65.3)                                      | 46 (30.9)                               | 46 (63.0)                           |
|                                                                               | New Zealand                     | 238 (8.6)                                           | 36 (8.9)                                        | 10 (6.7)                                | 10 (13.7)                           |
|                                                                               | Egypt                           | 93 (3.4)                                            | 15 (3.7)                                        | 3 (2.0)                                 | 3 (4.1)                             |
|                                                                               | Malaysia                        | 29 (1.1)                                            | 4 (1.0)                                         | 2 (1.3)                                 | 2 (2.7)                             |
|                                                                               | Turkey                          | 78 (2.8)                                            | 14 (3.5)                                        | 2 (1.3)                                 | 2 (2.7)                             |
|                                                                               | Brazil                          | 97 (3.5)                                            | 16 (4.0)                                        | 2 (1.3)                                 | 2 (2.7)                             |
|                                                                               | Poland                          | 20 (0.7)                                            | 2 (0.5)                                         | 2 (1.3)                                 | 2 (2.7)                             |
|                                                                               | Italy                           | 39 (1.4)                                            | 5 (1.2)                                         | 2 (1.3)                                 | 2 (2.7)                             |
|                                                                               | Greece                          | 23 (0.8)                                            | 2 (0.5)                                         | 1 (0.7)                                 | 1 (1.4)                             |
|                                                                               | Switzerland                     | 40 (1.5)                                            | 4 (1.0)                                         | 1 (0.7)                                 | 1 (1.4)                             |
|                                                                               | USA                             | 38 (1.4)                                            | 8 (2.0)                                         | 1 (0.7)                                 | 1 (1.4)                             |
|                                                                               | China                           | 48 (1.7)                                            | 7 (1.7)                                         | 1 (0.7)                                 | 1 (1.4)                             |
|                                                                               | Anonymous/missing*              | -                                                   | -                                               | 76 (51.0)                               | -                                   |
| Primary<br>sponsor type                                                       | University                      | 912 (33.1)                                          | 135 (33.4)                                      | 26 (17.4)                               | 26 (35.6)                           |
|                                                                               | Individual                      | 754 (27.4)                                          | 111 (27.5)                                      | 21 (14.1)                               | 21 (28.8)                           |
|                                                                               | Hospital                        | 495 (18.0)                                          | 75 (18.6)                                       | 13 (8.7)                                | 13 (17.8)                           |
|                                                                               | Government body                 | 140 (5.1)                                           | 18 (4.5)                                        | 7 (4.7)                                 | 7 (9.6)                             |
|                                                                               | Other collaborative groups      | 66 (2.4)                                            | 10 (2.5)                                        | 4 (2.7)                                 | 4 (5.5)                             |
|                                                                               | Commercial sector/Industry      | 240 (8.7)                                           | 36 (8.9)                                        | 2 (1.3)                                 | 2 (2.7)                             |
|                                                                               | Charities/societies/foundations | 91 (3.3)                                            | 12 (3.0)                                        | 0 (0.0)                                 | 0 (0.0)                             |
|                                                                               | Other                           | 57 (2.1)                                            | 7 (1.7)                                         | 0 (0.0)                                 | 0 (0.0)                             |
|                                                                               | Anonymous/missing*              | -                                                   | -                                               | 76 (51.0)                               | -                                   |
| Primary<br>sponsor type<br>– grouped                                          | Industry                        | 240 (8.7)                                           | 36 (8.9)                                        | 2 (1.3)                                 | 2 (2.7)                             |
|                                                                               | Non-industry                    | 2515 (91.3)                                         | 368 (91.1)                                      | 71 (47.7)                               | 71 (97.3)                           |
|                                                                               | Anonymous/missing*              | -                                                   | -                                               | 76 (51.0)                               | -                                   |
| Intervention<br>type                                                          | Drug                            | 746 (18.9)                                          | 102 (25.2)                                      | 12 (8.1)                                | 12 (16.4)                           |
|                                                                               | Non-drug                        | 3201 (81.1)                                         | 302 (74.8)                                      | 61 (40.9)                               | 61 (83.6)                           |
|                                                                               | Anonymous/missing*              | -                                                   | -                                               | 76 (51.0)                               | -                                   |
| Sample size <sup>^</sup>                                                      | <100                            | 1746 (63.4)                                         | 267 (66.1)                                      | 37 (24.8)                               | 37 (50.7)                           |
|                                                                               | 100-500                         | 805 (29.2)                                          | 107 (26.5)                                      | 29 (19.5)                               | 29 (39.7)                           |
|                                                                               | >500                            | 204 (7.4)                                           | 30 (7.4)                                        | 7 (4.7)                                 | 7 (9.6)                             |
|                                                                               | Anonymous/missing*              | -                                                   | -                                               | 76 (51.0)                               | -                                   |
| Registration<br>year                                                          | 2010                            | 499 (18.1)                                          | 77 (19.1)                                       | 9 (6.0)                                 | 9 (12.3)                            |
|                                                                               | 2011                            | 514 (18.7)                                          | 76 (18.8)                                       | 11 (7.4)                                | 11 (15.1)                           |
|                                                                               | 2012                            | 423 (15.4)                                          | 59 (14.6)                                       | 13 (8.7)                                | 13 (17.8)                           |
|                                                                               | 2013                            | 428 (15.6)                                          | 65 (16.1)                                       | 10 (6.7)                                | 10 (13.7)                           |
|                                                                               | 2014                            | 405 (14.7)                                          | 55 (13.6)                                       | 15 (10.1)                               | 15 (20.5)                           |
|                                                                               | 2015                            | 486 (17.6)                                          | 72 (17.8)                                       | 15 (10.1)                               | 15 (20.5)                           |
|                                                                               | Anonymous/missing*              | -                                                   | -                                               | 76 (51.0)                               | -                                   |
| Recruitment<br>start year <sup>+</sup>                                        | <2010                           | 705 (25.6)                                          | 96 (23.8)                                       | 15 (10.1)                               | 15 (20.5)                           |
|                                                                               | 2010                            | 461 (16.7)                                          | 80 (19.8)                                       | 10 (6.7)                                | 10 (13.7)                           |
|                                                                               | 2011                            | 370 (13.4)                                          | 58 (14.4)                                       | 16 (10.7)                               | 16 (21.9)                           |
|                                                                               | 2012                            | 343 (12.5)                                          | 55 (13.6)                                       | 12 (8.1)                                | 12 (16.4)                           |
|                                                                               | 2013                            | 319 (11.6)                                          | 40 (9.9)                                        | 5 (3.4)                                 | 5 (6.8)                             |
|                                                                               | 2014                            | 287 (10.4)                                          | 36 (8.9)                                        | 8 (5.4)                                 | 8 (11.0)                            |
|                                                                               | 2015                            | 270 (9.8)                                           | 39 (9.7)                                        | 7 (4.7)                                 | 7 (9.6)                             |
|                                                                               | Anonymous/missing*              | -                                                   | -                                               | 76 (51.0)                               | -                                   |
| Allocation                                                                    | Randomised                      | 2045 (74.2)                                         | 304 (75.2)                                      | 51 (34.2)                               | 51 (69.9)                           |
|                                                                               | Non-randomised                  | 710 (25.8)                                          | 100 (24.8)                                      | 22 (14.8)                               | 22 (30.1)                           |
|                                                                               | Anonymous/missing*              | -                                                   | -                                               | 76 (51.0)                               | -                                   |
| Days between enrolment start and retrospective<br>registration - Median (IQR) |                                 | 242 (713)                                           | 224.5 (802)                                     | 387 (877)<br>(n=76 missing)             | 387 (877)                           |

<sup>#</sup> All retrospectively registered interventional trials on ANZCTR between 1 Jan 2010 – 31 Dec 2015

\* Survey respondents could choose to remain anonymous, therefore data not available

<sup>^</sup> Actual sample size where available, otherwise target sample size used.

<sup>+</sup> Actual date of first participant enrolment where available, otherwise anticipated date of first participant enrolment used.
