# Supplementary material
Source: HighWire-hosted journal article supplement (https://bmjopen.bmj.com/content/8/3/e019983)
Supplement: inline-supplementary-material-6 [file inline-supplementary-material-6.pdf]

**Appendix 7a. Coding of survey categories and open response codes into response categories as displayed in Figure 6**

| <b>Reported Category</b>                                 | <b>Survey Category</b>                                                                                                                                                                                                                                                                                                                                                 | <b>Open Responses Code</b>                                                                                                                                                                                                              |
|----------------------------------------------------------|------------------------------------------------------------------------------------------------------------------------------------------------------------------------------------------------------------------------------------------------------------------------------------------------------------------------------------------------------------------------|-----------------------------------------------------------------------------------------------------------------------------------------------------------------------------------------------------------------------------------------|
| Lack of awareness                                        | <ul style="list-style-type: none"> <li>I was not aware of the prospective registration requirement.</li> <li>I did not think prospective registration was important.</li> <li>I thought the prospective registration requirement only applied to industry funded trials.</li> <li>I did not realise that my study meets the definition of a clinical trial.</li> </ul> | <ul style="list-style-type: none"> <li>Student/ early researcher/ first study - not aware/ not told to do so by supervisor</li> <li>Did not understand definition clinical trial</li> <li>Thought ethics approval was enough</li> </ul> |
| Lack of organisation/time                                | <ul style="list-style-type: none"> <li>I did not have enough time.</li> <li>I knew it was a requirement but forgot to do it.</li> <li>I thought somebody else had registered the study already.</li> <li>I did not think I was responsible for registration of this study.</li> </ul>                                                                                  | <ul style="list-style-type: none"> <li>Thought someone else was responsible/ joined trial late</li> <li>Busy/ occupied with other things at that time/ forgot</li> </ul>                                                                |
| Thought my submitted study had been registered already   | <ul style="list-style-type: none"> <li>I thought my submitted study had been registered already - I did not realise that final approval was pending.</li> </ul>                                                                                                                                                                                                        | <ul style="list-style-type: none"> <li>Thought it was already approved/ prospectively registered</li> </ul>                                                                                                                             |
| Thought prospective submission was sufficient            | <ul style="list-style-type: none"> <li>I thought it was sufficient to submit the form before commencing enrolment - I did not realise that full approval was required.</li> </ul>                                                                                                                                                                                      | <ul style="list-style-type: none"> <li>Registered at the beginning of recruitment (thought that was sufficient)</li> </ul>                                                                                                              |
| Already registered prospectively elsewhere               | <ul style="list-style-type: none"> <li>I already registered prospectively elsewhere.</li> </ul>                                                                                                                                                                                                                                                                        | <ul style="list-style-type: none"> <li>Already registered somewhere else</li> </ul>                                                                                                                                                     |
| Local registry did not accept retrospective registration | <ul style="list-style-type: none"> <li>My local registry does not accept retrospective registration so I used ANZCTR instead.</li> </ul>                                                                                                                                                                                                                               | -                                                                                                                                                                                                                                       |
| Follow-up study (recruitment prior to planning of study) | -                                                                                                                                                                                                                                                                                                                                                                      | <ul style="list-style-type: none"> <li>Registration after pilot study</li> <li>Part of larger prospectively registered study/ follow-up to prospectively registered study</li> </ul>                                                    |
| Study commencement prior to registration requirements    |                                                                                                                                                                                                                                                                                                                                                                        | <ul style="list-style-type: none"> <li>Study conducted prior to registration requirements</li> </ul>                                                                                                                                    |
| Journal requirements                                     |                                                                                                                                                                                                                                                                                                                                                                        | <ul style="list-style-type: none"> <li>Registered because of journal requirements</li> </ul>                                                                                                                                            |

**Appendix 7b. Coding of survey categories and open response codes into response categories as displayed in Figure 7**

| <b>Reported Category</b>                    | <b>Survey Category</b>                                                                                                                                                                                                                                                          | <b>Open Responses Code</b>                                                                                                                                    |
|---------------------------------------------|---------------------------------------------------------------------------------------------------------------------------------------------------------------------------------------------------------------------------------------------------------------------------------|---------------------------------------------------------------------------------------------------------------------------------------------------------------|
| Registration linked to ethics               | <ul style="list-style-type: none"> <li>Registration ID required on ethics form.</li> <li>Having ethics submission automatically uploaded to ANZCTR.</li> <li>Having prospective registration on a checklist provided by ethics committee or another regulatory body.</li> </ul> | <ul style="list-style-type: none"> <li>Ethics committee asking for trial registration number</li> <li>Ethics form uploaded to ANZCTR once approved</li> </ul> |
| Included in organisation's procedure manual | <ul style="list-style-type: none"> <li>Having it included in my organisation's procedures manual.</li> </ul>                                                                                                                                                                    | <ul style="list-style-type: none"> <li>Adopted in Standard Procedure Manual</li> <li>Checklist by institution</li> </ul>                                      |
| Software prompts                            | <ul style="list-style-type: none"> <li>Software prompts from a regulatory body/other.</li> </ul>                                                                                                                                                                                | -                                                                                                                                                             |
| Processing time                             | -                                                                                                                                                                                                                                                                               | <ul style="list-style-type: none"> <li>Reduction time between submission and approval</li> </ul>                                                              |
| Clearer criteria                            | -                                                                                                                                                                                                                                                                               | <ul style="list-style-type: none"> <li>Clearer criteria/ less queries/ requested changes</li> </ul>                                                           |
| Other                                       |                                                                                                                                                                                                                                                                                 | <ul style="list-style-type: none"> <li>Very specific individual reasons (e.g. institutional/ team changes)</li> </ul>                                         |
| Nothing                                     |                                                                                                                                                                                                                                                                                 | <ul style="list-style-type: none"> <li>e.g. nothing, it was my bad</li> </ul>                                                                                 |
