# Supplementary material
Source: HighWire-hosted journal article supplement (https://bmjopen.bmj.com/content/8/3/e019983)
Supplement: inline-supplementary-material-7 [file inline-supplementary-material-7.pdf]

#### Appendix 5A. Median time from registration to trial start for funding source country

| Year of registration | Prospective       |     |       | Retrospective     |     |       |
|----------------------|-------------------|-----|-------|-------------------|-----|-------|
|                      | Median (min, max) |     |       | Median (min, max) |     |       |
|                      | ANZ               | WHO | Other | ANZ               | WHO | Other |
| 2006                 | 26                | 39  | 63    | 182               | 270 | 530   |
| 2007                 | 41                | 35  | 41    | 212               | 169 | 1410  |
| 2008                 | 60                | 39  | 48    | 105               | 357 | 1058  |
| 2009                 | 48                | 37  | 66    | 120               | 329 | 541   |
| 2010                 | 60                | 27  | 51    | 215               | 310 | 663   |
| 2011                 | 60                | 23  | 26    | 310               | 421 | 448   |
| 2012                 | 43                | 21  | 13    | 282               | 509 | 389   |
| 2013                 | 40                | 27  | 27    | 193               | 465 | 567   |
| 2014                 | 35                | 20  | 11    | 170               | 334 | 256   |
| 2015                 | 25                | 17  | 18    | 91                | 85  | 410   |

ANZ= Australia/New Zealand; WHO = other countries with a WHO Network Registry; Other = all other countries

#### Appendix 5B. Median time from registration to trial start for primary sponsor country

| Year of registration | Prospective |     |       | Retrospective |     |       |
|----------------------|-------------|-----|-------|---------------|-----|-------|
|                      | Median      |     |       | Median        |     |       |
|                      | ANZ         | WHO | Other | ANZ           | WHO | Other |
| 2006                 | 26          | 73  | 71    | 148           | 228 | 1098  |
| 2007                 | 45          | 33  | 41    | 150           | 153 | 1283  |
| 2008                 | 48          | 26  | 73    | 117           | 348 | 882   |
| 2009                 | 47          | 35  | 36    | 112           | 364 | 685   |
| 2010                 | 55          | 23  | 40    | 189           | 318 | 712   |
| 2011                 | 56          | 17  | 26    | 331           | 452 | 516   |
| 2012                 | 41          | 22  | 14    | 224           | 519 | 395   |
| 2013                 | 38          | 22  | 21    | 158           | 465 | 525   |
| 2014                 | 34          | 20  | 11    | 151           | 373 | 420   |
| 2015                 | 25          | 20  | 18    | 97            | 145 | 359   |

ANZ= Australia/New Zealand; WHO = other countries with a WHO Network Registry; Other = all other countries
